# Supplementary material for: Relative Validity and Reproducibility of a Short Food Frequency Questionnaire to Assess Nutrient Intakes of New Zealand Adults
Source: PubMed Central journal article supplement (PMC7146506; doi:10.3390/nu12030619), 2020-02-27
Supplement: nutrients-12-00619-s001.pdf [file nutrients-12-00619-s001.pdf]

Sam et al. Relative validity and Reproducibility of a Short Food Frequency Questionnaire to Assess Nutrient Intake of New Zealand Adults.

**Table S1. List of food items included in the Short Food Frequency Questionnaire.**

| <b>Food group</b> | <b>Food item(s)</b>                                                                                                             |
|-------------------|---------------------------------------------------------------------------------------------------------------------------------|
| Dairy foods       |                                                                                                                                 |
|                   | Milk (include milk in hot drinks, cereals, creamed soups etc) e.g. Cow, Soy*                                                    |
|                   | Ice cream                                                                                                                       |
|                   | Yoghurt                                                                                                                         |
|                   | Low fat cheese e.g. Cottage, Ricotta, Low Fat Cheddar                                                                           |
|                   | Cheese e.g. Cheddar, Edam, Tasty, Mozzarella, Brie, Camembert                                                                   |
|                   | Cream based dairy e.g. Cream, Sour cream, Cream cheese                                                                          |
| Fruits            |                                                                                                                                 |
|                   | Bananas                                                                                                                         |
|                   | Apples/Pears                                                                                                                    |
|                   | Citrus fruit: Oranges, Mandarins, Grapefruit, Lemons                                                                            |
|                   | Stone fruit e.g. Apricots, Plums, Nectarines, Peaches                                                                           |
|                   | Berries fresh, frozen or canned e.g. Strawberries, Blueberries                                                                  |
|                   | Dried fruit e.g. Raisins, Sultanas, Prunes                                                                                      |
|                   | Other fruit e.g. Kiwifruit, Grapes, Feijoa, Pineapple, Mango, Rhubarb, Tamarillos, Guava, Pawpaw, Melon                         |
| Vegetables        |                                                                                                                                 |
|                   | Tomatoes (fresh, canned), tomato based sauce                                                                                    |
|                   | Beans or legumes e.g. Green beans, Runner beans, Baked beans, Lentils, Chickpeas                                                |
|                   | Salad Greens e.g. Lettuce, Cucumber, Celery, Rocket                                                                             |
|                   | Other Greens: Broccoli, Cauliflower, Spinach, Silverbeet, Cabbage, Brussel Sprouts, Bok choy, Chinese cabbage, Watercress, Puha |
|                   | Onion, Leeks                                                                                                                    |
|                   | Potatoes, Kumara, Pumpkin                                                                                                       |
|                   | Other Root Vegetables e.g. Carrot, Beetroot, Parsnip, Turnips, Yams                                                             |
|                   | Other Vegetables e.g. Corn, Mushrooms, Asparagus, Courgette, Eggplant, Capsicum, Peas, Coleslaw                                 |
| Eggs, Meat, Etc   |                                                                                                                                 |
|                   | Eggs                                                                                                                            |
|                   | Sausages, Hotdogs                                                                                                               |
|                   | Salami, Ham, Luncheon, Bacon or other processed meat                                                                            |
|                   | Beef, Pork or Lamb e.g. mince, roast, steak, stew, casserole, lasagne, frozen dinners, etc                                      |
|                   | Meat pie, 2 sausage rolls                                                                                                       |
|                   | Chicken and other poultry                                                                                                       |
|                   | Tuna, Salmon, Sardines, Mackerel                                                                                                |
|                   | Fried fish, Battered fish, Breaded fish, Fish fingers                                                                           |

|                                    |                                                                                          |
|------------------------------------|------------------------------------------------------------------------------------------|
|                                    | Other Fish and Seafood e.g. Cod, Sole, Hoki, Gurnard, Shrimp, Mussels, Oysters, Crayfish |
| Breads, cereals, starches          |                                                                                          |
|                                    | High Fibre Cereals e.g. Porridge, Muesli, Bran Flakes, All Bran                          |
|                                    | Other Cold Breakfast Cereal e.g. Light 'n' Tasty, Special K, Weetbix                     |
|                                    | White Bread including Sliced, Tortillas, Pita etc                                        |
|                                    | Wholemeal or multigrain Bread including Sliced, Tortillas, Pita etc                      |
|                                    | Crackers, Crispbread e.g. Vitawheat, Cruskits                                            |
|                                    | Pancakes, Waffles, Sweet Buns, Scones                                                    |
|                                    | Brown Rice/Wholemeal Pasta                                                               |
|                                    | White rice / Couscous                                                                    |
|                                    | Other Pasta e.g. Spaghetti, Spirals, Instant noodles, Tinned                             |
| Fastfoods                          |                                                                                          |
|                                    | Hot chips/French fries                                                                   |
|                                    | Potato Chips/Crisps or Corn chips                                                        |
|                                    | Pizza/Hamburgers                                                                         |
|                                    | International Takeaway e.g. Chinese, Thai, Turkish, Indian, Japanese etc                 |
| Beverages                          |                                                                                          |
|                                    | Low-calorie drink, e.g. Diet Coke, Coke Zero, Sprite Zero                                |
|                                    | Sweet drinks e.g. Sprite, Coke, Fruit juice, Raro, Cordial                               |
|                                    | Alcoholic Beverages e.g. Beer, Wine, Spirits                                             |
|                                    | Water: Bottled, Sparkling, or Tap                                                        |
|                                    | Tea/Coffee                                                                               |
| Sweets, baked goods, miscellaneous |                                                                                          |
|                                    | Chocolate/Chocolate bars                                                                 |
|                                    | Sweets, Lollies                                                                          |
|                                    | Biscuits                                                                                 |
|                                    | Cake, Brownie, Slice, Croissant, Pie, Danish, Brioche, Milk Pudding, Muesli bars         |
|                                    | Jam, Preserves, Syrup, Honey                                                             |
|                                    | Nuts (include Peanut butter), seeds                                                      |
|                                    | Oils e.g. Vegetable oil, Olive oil, Mayonnaise, Salad dressing, include frying           |
|                                    | Fats e.g. Butter or Margarine, used as spreads or in cooking, excluding baking           |
|                                    | Iodized salt, at table and in cooking                                                    |

\*Participants were asked in a separate question what type of milk they usually used.
